# Supplementary material for: Cold Chain Food and COVID-19 Transmission Risk: From the Perspective of Consumption and Trade
Source: Foods. 2022 Mar 22;11(7):908. doi: 10.3390/foods11070908 (PMC8998142; doi:10.3390/foods11070908)
Supplement: Supplementary file 1 [file foods-11-00908-s001.zip › Supporting Information_Revision.pdf]

# Cold Chain Food and Covid-19 Transmission Risk: From the Perspective of Consumption and Trade

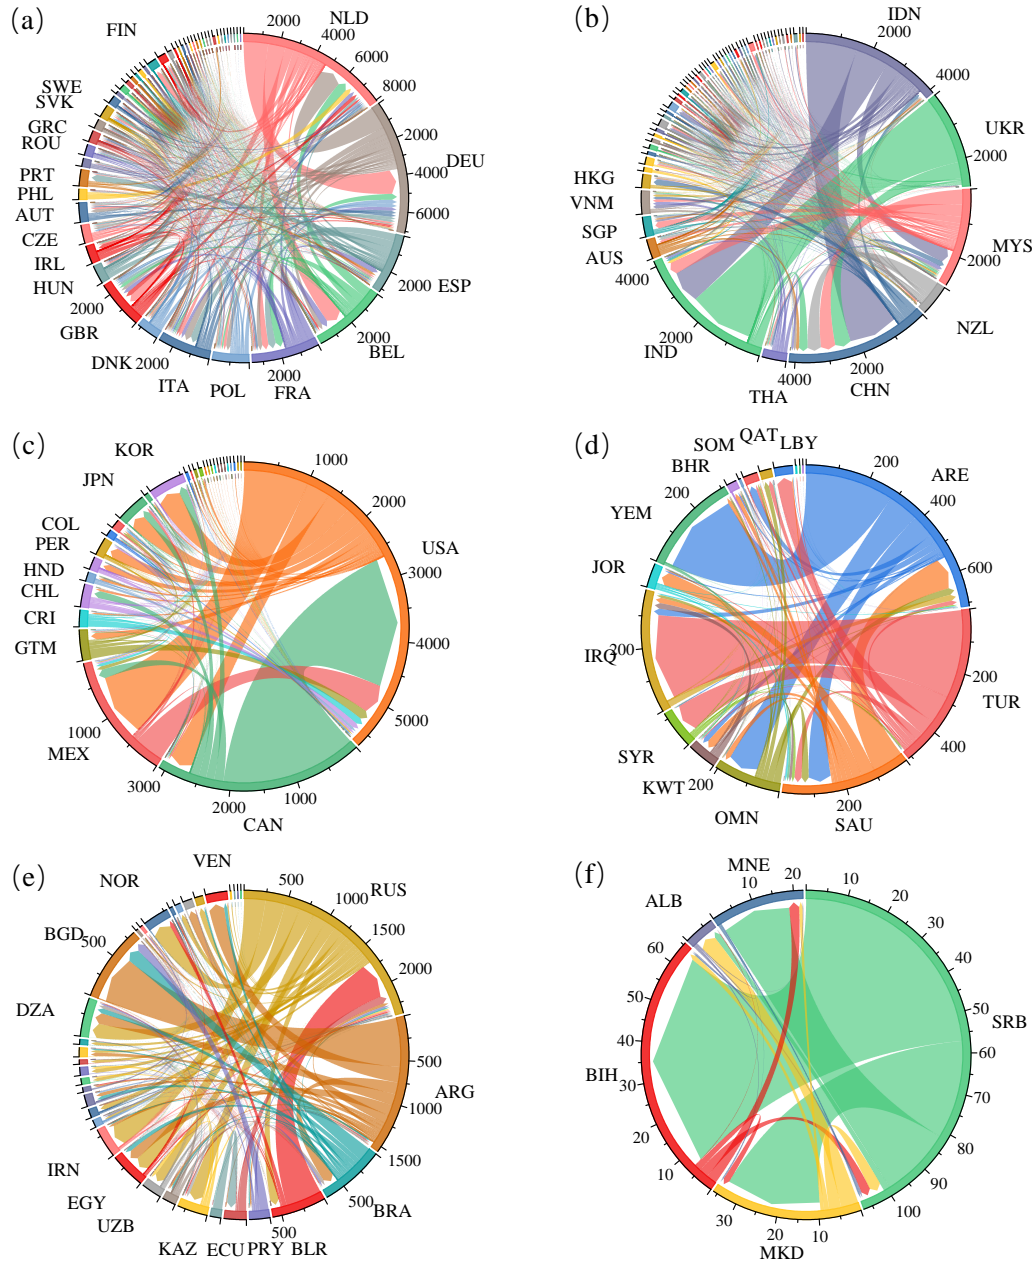

**Figure S1** Flow of the emery within the global CCFTN communities. A total of 198 countries are ranked according to the total trade quantity and plotted clockwise in descending order. The size of the out bar indicates the total trade quantity (unit:  $10^6$  kcal). Export quantity is indicated with links emanating from the out bar of the same color. (a) NLD-DEU community, (b) IDN-UKR community, (c) USA-CAN community, (d) ARG-RUS community, (e) TUR-ARE community, (f) SRB-MKD community.

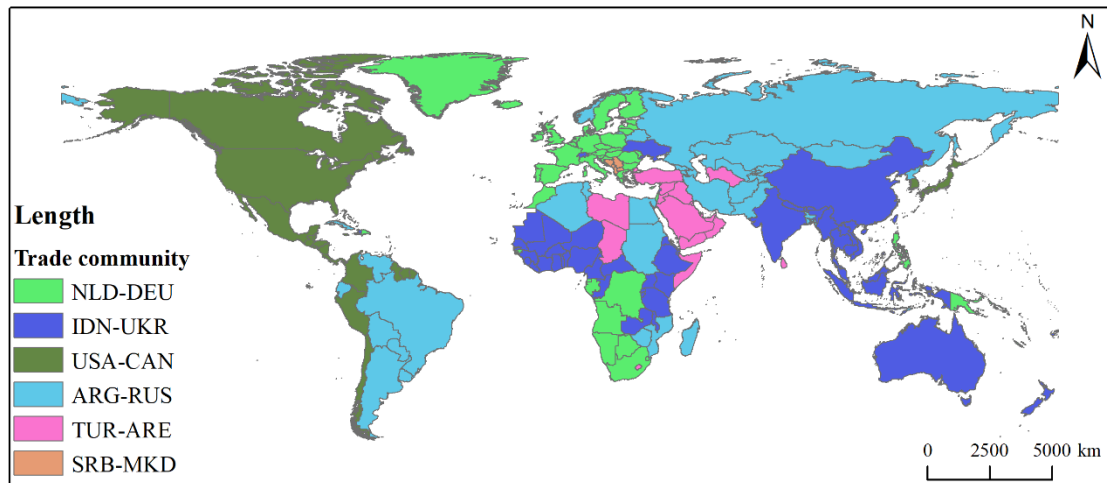

**Figure S2** Spatial pattern of trade community of cold chain foods trade networks.

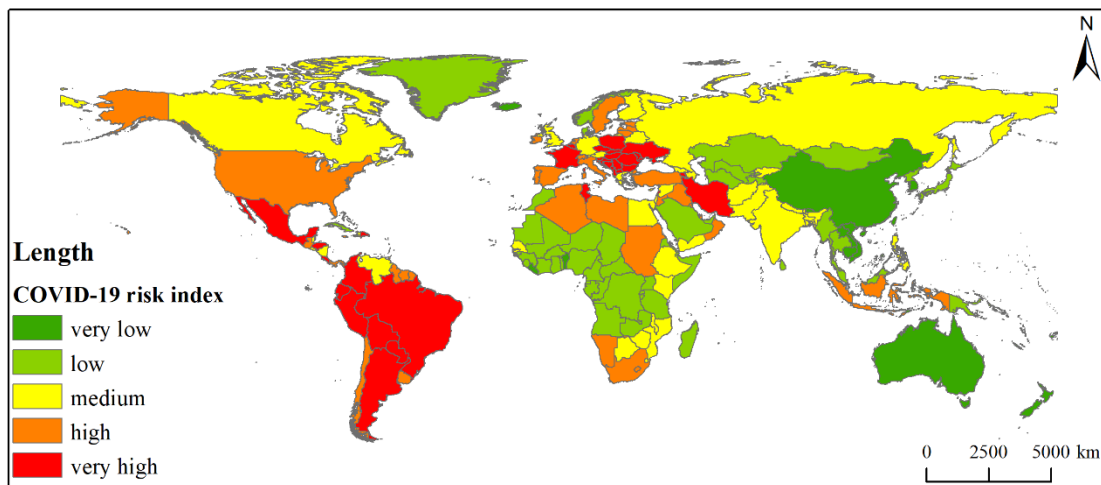

**Figure S3** Spatial pattern of the COVID-19 risk index (CRI)

**Table S1** Imported cold-chain food tested positive for SARS-CoV-2 in China in 2020 [1]

| Date                | Product                     | From         | Found by                                                   | Note                                                                                                                           |
|---------------------|-----------------------------|--------------|------------------------------------------------------------|--------------------------------------------------------------------------------------------------------------------------------|
| June 11             | Frozen salmon               | Not reported | Xinfadi market (XFDM), Beijing city                        | SARS-CoV-2 was found on frozen seafood in China for the first time.                                                            |
| July 3 to August 13 | Frozen white shrimp         | Ecuador      | Dalian, Xiamen, and five other cities in Shandong Province | For the second time, SARS-CoV-2 was found on frozen seafood in China following a month after the COVID-19 outbreak in Beijing. |
| August 9            | A variety of frozen seafood | Not reported | Dalian in Liaoning Province, Yantai in Shandong Province   |                                                                                                                                |
| August 13           | Frozen chicken wings        | Brazil       | Guangdong Province                                         |                                                                                                                                |
| September 18        | Frozen hair-tail            | Indonesia    |                                                            |                                                                                                                                |

|              |                                    |                        |                                 |                                                                                                                                                                                                                                             |  |
|--------------|------------------------------------|------------------------|---------------------------------|---------------------------------------------------------------------------------------------------------------------------------------------------------------------------------------------------------------------------------------------|--|
| September 23 | Frozen deep-water redfish          | Norway                 |                                 |                                                                                                                                                                                                                                             |  |
| September 24 | Frozen cod outer package's surface | Not reported           | Qingdao city, Shandong Province | This is the first time worldwide, SARS-CoV-2 was isolated from the frozen fish outer package's surface. The virus has not been isolated due to the low nucleic acid concentration of the samples (from the outer package's surface) tested. |  |
| September 25 | Frozen hair-tail                   | Brazil                 |                                 |                                                                                                                                                                                                                                             |  |
| October 1    | Frozen boneless beef               | Brazil                 |                                 |                                                                                                                                                                                                                                             |  |
| October 17   | Frozen cod                         | Not reported           | Qingdao Port, Shandong Province |                                                                                                                                                                                                                                             |  |
| October 31   | Frozen pomfret                     | Ecuador                |                                 |                                                                                                                                                                                                                                             |  |
| November 6   | Aquatic product                    | Russia and Netherlands |                                 |                                                                                                                                                                                                                                             |  |
| November 7–8 | Frozen pork and frozen hairtail    | Germany and India      | Tianjin city                    | No community transmission has occurred.                                                                                                                                                                                                     |  |
| November 10  | Frozen pomfret                     | Indonesia              |                                 |                                                                                                                                                                                                                                             |  |
| December 9   | Frozen boneless beef               | Brazil                 |                                 |                                                                                                                                                                                                                                             |  |
| December 17  | Frozen cod                         | Not reported           | Dalian in Liaoning Province     | No community transmission has occurred.                                                                                                                                                                                                     |  |

**Table S2** Cold-chain food tested positive for SARS-CoV-2 in countries in 2020

| Time                | Outbreak city                       | Place                                  | Number infected/Ratio% | Reference |
|---------------------|-------------------------------------|----------------------------------------|------------------------|-----------|
| As for May 31, 2020 | United States of America, 14 States | Meat and poultry processing            | 16233/9.1%             | [2]       |
| June 12, 2020       | United States of America, Oregon    | Seafood plant                          | 132/ Not reported      | [3]       |
| June 17, 2020       | Germany, Gütersloh                  | Slaughterhouse                         | 657/66.66%             | [4]       |
| June 08, 2020       | Germany, Westfleisch                | Slaughterhouse                         | 151/75.5%              | [5]       |
| June 23, 2020       | United Kingdom, Anglesey            | Chicken processing site                | 150/ Not reported      | [6]       |
| August, 2020        | New Zealand, Auckland               | Worker engaged in handling frozen food | 4/ Not reported        | [7]       |

## References

1. Lu, L.C.; Quintela, I.; Lin, C.H.; Lin, T.C.; Lin, C.H.; Wu, V.C.H.; Lin, C.S. A review of epidemic investigation on cold - chain food - mediated SARS - CoV - 2 transmission and food safety consideration during COVID - 19 pandemic. *Journal of Food Safety* **2021**, *n/a*, e12932, doi:10.1111/jfs.12932.
2. Waltenburg, M.A.; Victoroff, T.; Rose, C.E.; Butterfield, M.; Jervis, R.H.; Fedak, K.M.; Gabel, J.A.; Feldpausch, A.; Dunne, E.M.; Austin, C.; et al. Update: COVID-19 Among Workers in Meat and Poultry Processing Facilities - United States, April-May 2020. *Mmwr-Morbidity and Mortality Weekly Report* **2020**, *69*, 887-892, doi:DOI 10.15585/mmwr.mm6927e2.
3. Pacific reopens some plants after COVID-19 outbreak; Icycle reports new cases in Alaska. Available online: <https://www.seafoodsource.com/news/supply-trade/pacific-reopens-some-plants-after-covid-19-outbreak-icycle-reports-new-cases-in-alaska> (accessed on
4. Coronavirus: Over 600 people test positive at German slaughterhouse. Available online: <https://www.dw.com/en/coronavirus-over-600-people-test-positive-at-german-slaughterhouse/a-53846038> (accessed on
5. Coronavirus outbreak closes German meat-packing plant. Available online: <https://www.dw.com/en/coronavirus-outbreak-closes-german-meat-packing-plant/a-53374478> (accessed on
6. Coronavirus: Why have there been so many outbreaks in meat processing plants? Available online: <https://www.bbc.com/news/53137613> (accessed on
7. Hu, L.; Gao, J.; Yao, L.; Zeng, L.; Liu, Q.; Zhou, Q.; Zhang, H.; Lu, D.; Fu, J.; Liu, Q.S.; et al. Evidence of Foodborne Transmission of the Coronavirus (COVID-19) through the Animal Products Food Supply Chain. *Environ Sci Technol* **2021**, *55*, 2713-2716, doi:10.1021/acs.est.0c06822.
