# Supplementary material for: Cold Chain Food and COVID-19 Transmission Risk: From the Perspective of Consumption and Trade
Source: Foods. 2022 Mar 22;11(7):908. doi: 10.3390/foods11070908 (PMC8998142; doi:10.3390/foods11070908)
Supplement: Supplementary file 1 [file foods-11-00908-s001.zip › Supporting Information_Table S3-S4.xlsx]

## Sheet: Note
Table S3 The cold chain food products and the calorie factors
Column “Item code”, “Item”，the name of food commodity reported in FAOSTAT.
Column “Calories (kcal/100 grammes)”, the nutritive conversion factors of the cold food products sources from FAOSTAT.
Table S4 The country name and ISO3 code. The data sources from the united nations statistics division. (https://unstats.un.org/unsd/methodology/m49/)

## Sheet: Table S3
Item code	Item	Calories (kcal/100 grammes)
36	Oil, rice bran	884
60	Oil, maize	884
118	Potatoes, frozen	73
237	Oil, soybean	884
244	Oil, groundnut	884
252	Oil, coconut (copra)	884
257	Oil, palm	158
258	Oil, palm kernel	884
261	Oil, olive, virgin	884
266	Oil, castor beans	884
268	Oil, sunflower	884
271	Oil, rapeseed	884
281	Oil, safflower	884
290	Oil, sesame	884
297	Oil, poppy	884
313	Oil, kapok	884
331	Oil, cottonseed	884
334	Oil, linseed	884
340	Oil, vegetable origin nes	884
358	Cabbages and other brassicas	19
366	Artichokes	20
367	Asparagus	12
372	Lettuce and chicory	12
373	Spinach	16
388	Tomatoes	17
390	Juice, tomato	76
391	Tomatoes, paste	84
392	Tomatoes, peeled	19
393	Cauliflowers and broccoli	9
394	Pumpkins, squash and gourds	19
397	Cucumbers and gherkins	13
399	Eggplants (aubergines)	21
401	Chillies and peppers, green	25
402	Onions, shallots, green	24
403	Onions, dry	31
406	Garlic	130
407	Leeks, other alliaceous vegetables	37
414	Beans, green	50
417	Peas, green	31
426	Carrots and turnips	38
446	Maize, green	106
447	Sweet corn frozen	54
448	Sweet corn prep or preserved	77
449	Mushrooms and truffles	24
451	Mushrooms, canned	24
460	Vegetables, fresh or dried products nes	22
463	Vegetables, fresh nes	22
464	Vegetables, dried nes	176
465	Vegetables, canned nes	36
469	Vegetables, dehydrated	341
471	Vegetables in vinegar	29
472	Vegetables, preserved nes	38
473	Vegetables, frozen	71
474	Vegetables, temporarily preserved	65
475	Vegetables, preserved, frozen	22
486	Bananas	60
489	Plantains and others	75
490	Oranges	34
491	Juice, orange, single strength	42
492	Juice, orange, concentrated	159
495	Tangerines, mandarins, clementines, satsumas	32
497	Lemons and limes	15
498	Juice, lemon, single strength	22
499	Juice, lemon, concentrated	116
507	Grapefruit (inc. pomelos)	16
509	Juice, grapefruit	39
510	Juice, grapefruit, concentrated	146
513	Juice, citrus, single strength	47
514	Juice, citrus, concentrated	157
515	Apples	48
518	Juice, apple, single strength	47
519	Juice, apple, concentrated	166
521	Pears	54
523	Quinces	35
526	Apricots	45
527	Apricots, dry	238
530	Cherries, sour	45
531	Cherries	65
534	Peaches and nectarines	33
536	Plums and sloes	52
537	Plums dried (prunes)	208
538	Juice, plum, single strength	71
539	Juice, plum, concentrated	215
549	Gooseberries	44
550	Currants	59
552	Blueberries	120
554	Cranberries	47
560	Grapes	53
561	Raisins	299
562	Juice, grape	61
567	Watermelons	17
568	Melons, other (inc.cantaloupes)	17
569	Figs	73
570	Figs dried	253
571	Mangoes, mangosteens, guavas	45
574	Pineapples	26
575	Pineapples canned	78
576	Juice, pineapple	56
577	Dates	156
580	Juice, pineapple, concentrated	179
591	Cashewapple	43
592	Kiwi fruit	52
600	Papayas	26
603	Fruit, tropical fresh nes	41
619	Fruit, fresh nes	45
620	Fruit, dried nes	267
622	Juice, fruit nes	48
623	Fruit, prepared nes	36
687	Pepper (piper spp.)	276
689	Chillies and peppers, dry	212
867	Meat, cattle	77
868	Offals, edible, cattle	105
869	Fat, cattle	105
870	Meat, cattle, boneless (beef & veal)	150
874	Meat, beef and veal sausages	313
875	Meat, beef, preparations	233
882	Milk, whole fresh cow	61
885	Cream fresh	195
886	Butter, cow milk	717
888	Milk, skimmed cow	35
889	Milk, whole condensed	321
890	Whey, condensed	26
891	Yoghurt	61
892	Yoghurt, concentrated or not	82
893	Buttermilk, curdled, acidified milk	75
894	Milk, whole evaporated	134
897	Milk, whole dried	496
898	Milk, skimmed dried	362
900	Whey, dry	346
901	Cheese, whole cow milk	387
907	Cheese, processed	103
908	Milk, reconstituted	61
909	Milk, products of natural constituents nes	48
910	Ice cream and edible ice	149
953	Ghee, buffalo milk	873
977	Meat, sheep	123
978	Offals, sheep,edible	117
982	Milk, whole fresh sheep	94
984	Cheese, sheep milk	310
1017	Meat, goat	123
1018	Offals, edible, goats	117
1035	Meat, pig	326
1036	Offals, pigs, edible	113
1037	Fat, pigs	712
1038	Meat, pork	326
1039	Bacon and ham	362
1041	Meat, pig sausages	417
1042	Meat, pig, preparations	239
1043	Lard	902
1058	Meat, chicken	122
1059	Offals, liver chicken	137
1060	Fat, liver prepared (foie gras)	462
1061	Meat, chicken, canned	165
1062	Eggs, hen, in shell	139
1063	Eggs, liquid	158
1064	Eggs, dried	594
1068	Ducks	291
1069	Meat, duck	291
1073	Meat, goose and guinea fowl	301
1074	Offals, liver geese	133
1075	Offals, liver duck	136
1080	Meat, turkey	126
1091	Eggs, other bird, in shell	163
1097	Meat, horse	85
1108	Meat, ass	94
1129	Fat, camels	847
1141	Meat, rabbit	118
1159	Offals, other camelids	105
1163	Meat, game	104
1164	Meat, dried nes	250
1166	Meat nes	126
1241	Margarine, liquid	720
1242	Margarine, short	720
1243	Fat nes, prepared	847
1274	Oil, boiled etc	902

## Sheet: Table S4
Serial number	ISO-alpha3 code	Country name
1	AFG	Afghanistan
2	AGO	Angola
3	ALB	Albania
4	ARE	United Arab Emirates
5	ARG	Argentina
6	ARM	Armenia
7	ATG	Antigua and Barbuda
8	AUS	Australia
9	AUT	Austria
10	AZE	Azerbaijan
11	BDI	Burundi
12	BEL	Belgium
13	BEN	Benin
14	BFA	Burkina Faso
15	BGD	Bangladesh
16	BGR	Bulgaria
17	BHR	Bahrain
18	BHS	Bahamas
19	BIH	Bosnia and Herzegovina
20	BLR	Belarus
21	BLZ	Belize
22	BOL	Bolivia (Plurinational State of)
23	BRA	Brazil
24	BRB	Barbados
25	BRN	Brunei Darussalam
26	BTN	Bhutan
27	BWA	Botswana
28	CAF	Central African Republic
29	CAN	Canada
30	CHE	Switzerland
31	CHL	Chile
32	CHN	China
33	CIV	Cote d'Ivoire
34	CMR	Cameroon
35	COD	Democratic Republic of the Congo
36	COG	Congo
37	COK	Cook Islands
38	COL	Colombia
39	COM	Comoros
40	CPV	Cape Verde
41	CRI	Costa Rica
42	CUB	Cuba
43	CYP	Cyprus
44	CZE	Czech Republic
45	DEU	Germany
46	DJI	Djibouti
47	DMA	Dominica
48	DNK	Denmark
49	DOM	Dominican Republic
50	DZA	Algeria
51	ECU	Ecuador
52	EGY	Egypt
53	ERI	Eritrea
54	ESP	Spain
55	EST	Estonia
56	ETH	Ethiopia
57	FIN	Finland
58	FJI	Fiji
59	FRA	France
60	FRO	Faroe Islands
61	FSM	Micronesia, Federated States of
62	GAB	Gabon
63	GBR	United Kingdom
64	GEO	Georgia
65	GHA	Ghana
66	GIN	Guinea
67	GMB	Gambia
68	GNB	Guinea-Bissau
69	GNQ	Equatorial Guinea
70	GRC	Greece
71	GRD	Grenada
72	GTM	Guatemala
73	GUY	Guyana
74	HKG	Hong Kong
75	HND	Honduras
76	HRV	Croatia
77	HTI	Haiti
78	HUN	Hungary
79	IDN	Indonesia
80	IND	India
81	IRL	Ireland
82	IRN	Iran (Islamic Republic of)
83	IRQ	Iraq
84	ISL	Iceland
85	ISR	Israel
86	ITA	Italy
87	JAM	Jamaica
88	JOR	Jordan
89	JPN	Japan
90	KAZ	Kazakhstan
91	KEN	Kenya
92	KGZ	Kyrgyzstan
93	KHM	Cambodia
94	KIR	Kiribati
95	KNA	Saint Kitts and Nevis
96	KOR	Korea, Republic of
97	KWT	Kuwait
98	LAO	Lao People's Democratic Republic
99	LBN	Lebanon
100	LBR	Liberia
101	LBY	Libyan Arab Jamahiriya
102	LCA	Saint Lucia
103	LKA	Sri Lanka
104	LSO	Lesotho
105	LTU	Lithuania
106	LUX	Luxembourg
107	LVA	Latvia
108	MAC	Macau
109	MAR	Morocco
110	MDA	Republic of Moldova
111	MDG	Madagascar
112	MDV	Maldives
113	MEX	Mexico
114	MHL	Marshall Islands
115	MKD	The former Yugoslav Republic of Macedonia
116	MLI	Mali
117	MLT	Malta
118	MMR	Burma
119	MNE	Montenegro
120	MNG	Mongolia
121	MOZ	Mozambique
122	MRT	Mauritania
123	MUS	Mauritius
124	MWI	Malawi
125	MYS	Malaysia
126	NAM	Namibia
127	NCL	New Caledonia
128	NER	Niger
129	NGA	Nigeria
130	NIC	Nicaragua
131	NIU	Niue
132	NLD	Netherlands
133	NOR	Norway
134	NPL	Nepal
135	NRU	Nauru
136	NZL	New Zealand
137	OMN	Oman
138	PAK	Pakistan
139	PAN	Panama
140	PER	Peru
141	PHL	Philippines
142	PNG	Papua New Guinea
143	POL	Poland
144	PRK	Korea, Democratic People's Republic of
145	PRT	Portugal
146	PRY	Paraguay
147	PSE	Palestine
148	PYF	French Polynesia
149	QAT	Qatar
150	ROU	Romania
151	RUS	Russia
152	RWA	Rwanda
153	SAU	Saudi Arabia
154	SDN	Sudan
155	SEN	Senegal
156	SGP	Singapore
157	SLB	Solomon Islands
158	SLE	Sierra Leone
159	SLV	El Salvador
160	SOM	Somalia
161	SRB	Serbia
162	SSD	South Sudan
163	STP	Sao Tome and Principe
164	SUR	Suriname
165	SVK	Slovakia
166	SVN	Slovenia
167	SWE	Sweden
168	SWZ	Swaziland
169	SYC	Seychelles
170	SYR	Syrian Arab Republic
171	TCD	Chad
172	TGO	Togo
173	THA	Thailand
174	TJK	Tajikistan
175	TKL	Tokelau
176	TKM	Turkmenistan
177	TLS	Timor-Leste
178	TON	Tonga
179	TTO	Trinidad and Tobago
180	TUN	Tunisia
181	TUR	Turkey
182	TUV	Tuvalu
183	TWN	Taiwan
184	TZA	United Republic of Tanzania
185	UGA	Uganda
186	UKR	Ukraine
187	URY	Uruguay
188	USA	United States
189	UZB	Uzbekistan
190	VCT	Saint Vincent and the Grenadines
191	VEN	Venezuela
192	VNM	Viet Nam
193	VUT	Vanuatu
194	WSM	Samoa
195	YEM	Yemen
196	ZAF	South Africa
197	ZMB	Zambia
198	ZWE	Zimbabwe
